# Supplementary material for: 18F-FLT Positron Emission Tomography (PET) is a Pharmacodynamic Marker for EWS-FLI1 Activity and Ewing Sarcoma
Source: PubMed Central journal article supplement — Sci Rep. 2016 Sep 27;6:33926. doi: 10.1038/srep33926 (PMC5037393; doi:10.1038/srep33926), 2016-09-27
Supplement: srep33926-s1.pdf [file srep33926-s1.pdf]

# Supplementary Data for:

## **<sup>18</sup>F-FLT Positron Emission Tomography (PET) is a Pharmacodynamic Marker for EWS-FLI1 Activity and Ewing Sarcoma**

Christy L Osgood<sup>1</sup>, Mohammed N Tantawy<sup>2</sup>, Nichole Maloney<sup>1</sup>, Zachary B Madaj<sup>3</sup>, Anderson Peck<sup>3</sup>, Elissa Boguslawski<sup>3</sup>, Jennifer Jess<sup>3</sup>, Jason Buck<sup>2</sup>, Mary E Winn<sup>3</sup>, H. Charles Manning<sup>2</sup>, Patrick J Grohar<sup>1,3,4,5\*,\*\*</sup>

\*Corresponding Author

\*\* Current Address: Van Andel Research Institute 333 Bostwick Ave, N.E., Grand Rapids, MI 49503; [patrick.grohar@vai.org](mailto:patrick.grohar@vai.org)

1 Division of Pediatric Hematology/Oncology, Vanderbilt University School of Medicine, Nashville, TN

2 Vanderbilt University Institute of Imaging Science

3 Van Andel Research Institute, Grand Rapids, MI

4 Helen De Vos Children's Hospital, Grand Rapids, MI

5 Michigan State University School of Medicine, Department of Pediatrics

# Supplementary Table 1

| Gene     | Cell | P       | FDR q   | 95% FCI Lower | 95% FCI Upper |
|----------|------|---------|---------|---------------|---------------|
| DRD2     | TC32 | <0.0001 | <0.0001 | 3.618         | 4.212         |
|          | TC71 | <0.0001 | <0.0001 | 4.851         | 5.168         |
|          | EW8  | <0.0001 | <0.0001 | 4.781         | 5.094         |
| FOLR1    | TC32 | <0.0001 | <0.0001 | 2.539         | 3.051         |
|          | TC71 | <0.0001 | <0.0001 | 2.393         | 2.902         |
|          | EW8  | <0.0001 | <0.0001 | 2.79          | 3.091         |
| ESR2     | TC32 | <0.0001 | <0.0001 | 1.659         | 1.993         |
|          | TC71 | 0.0003  | 0.0004  | 1.75          | 2.487         |
|          | EW8  | <0.0001 | <0.0001 | 2.501         | 2.884         |
| DRD3     | TC32 | <0.0001 | <0.0001 | 1.643         | 1.902         |
|          | TC71 | <0.0001 | 0.0001  | 1.768         | 2.34          |
|          | EW8  | 0.0018  | 0.0024  | 1.33          | 1.847         |
| GRM5     | TC32 | 0.0002  | 0.0003  | 1.55          | 2.039         |
|          | TC71 | <0.0001 | <0.0001 | 2.145         | 2.503         |
|          | EW8  | 0.0002  | 0.0003  | 1.465         | 1.899         |
| SLC7A11  | TC32 | 0.0016  | 0.0023  | 1.216         | 1.547         |
|          | TC71 | 0.0017  | 0.0024  | 1.207         | 1.531         |
|          | EW8  | 0.0098  | 0.0127  | 1.109         | 1.436         |
| AR       | TC32 | 0.0261  | 0.0313  | 1.068         | 1.453         |
|          | TC71 | <0.0001 | <0.0001 | 1.306         | 1.467         |
|          | EW8  | 0.0176  | 0.0223  | 1.092         | 1.478         |
| HK1      | TC32 | 0.0254  | 0.0313  | 1.055         | 1.36          |
|          | TC71 | 0.1697  | 0.1852  | 0.968         | 1.222         |
|          | EW8  | 0.2179  | 0.2324  | 0.957         | 1.212         |
| TSPO     | TC32 | 0.3524  | 0.3678  | 0.89          | 1.322         |
|          | TC71 | 0.6615  | 0.6615  | 0.885         | 1.181         |
|          | EW8  | 0.6615  | 0.6615  | 0.885         | 1.181         |
| ESR1     | TC32 | 0.0358  | 0.042   | 1.029         | 1.263         |
|          | TC71 | 0.037   | 0.0423  | 1.028         | 1.261         |
|          | EW8  | 0.1045  | 0.1166  | 0.988         | 1.258         |
| ENT1     | TC32 | <0.0001 | <0.0001 | 0.54          | 0.683         |
|          | TC71 | <0.0001 | <0.0001 | 0.536         | 0.62          |
|          | EW8  | 0.0008  | 0.0012  | 0.711         | 0.872         |
| SLC1A5   | TC32 | <0.0001 | <0.0001 | 0.426         | 0.624         |
|          | TC71 | <0.0001 | <0.0001 | 0.581         | 0.707         |
|          | EW8  | <0.0001 | <0.0001 | 0.645         | 0.759         |
| ENT2     | TC32 | <0.0001 | <0.0001 | 0.395         | 0.525         |
|          | TC71 | <0.0001 | <0.0001 | 0.449         | 0.574         |
|          | EW8  | 0.0001  | 0.0002  | 0.783         | 0.882         |
| ALK      | TC32 | <0.0001 | <0.0001 | 0.328         | 0.499         |
|          | TC71 | <0.0001 | <0.0001 | 0.459         | 0.551         |
|          | EW8  | <0.0001 | <0.0001 | 0.312         | 0.447         |
| TK1      | TC32 | <0.0001 | <0.0001 | 0.257         | 0.398         |
|          | TC71 | <0.0001 | <0.0001 | 0.35          | 0.502         |
|          | EW8  | <0.0001 | <0.0001 | 0.313         | 0.49          |
| EWS-FLI1 | TC32 | <0.0001 | <0.0001 | 0.085         | 0.148         |
|          | TC71 | <0.0001 | <0.0001 | 0.223         | 0.323         |
|          | EW8  | <0.0001 | <0.0001 | 0.098         | 0.112         |

**Supplementary Table 1:** Results table for initial screening of genes simultaneously suppressed with ESW-FLI1 (Fig. 1b). FDR q: Benjamini-Hochberg false-discovery rate adjusted p-values. FCI: false coverage interval.

## Supplementary Table 2

| Gene | Cell | P       | FDR q   | FCI Lower | FCI Upper |
|------|------|---------|---------|-----------|-----------|
| ENT1 | TC32 | <0.0001 | <0.0001 | 0.5377    | 0.6223    |
|      | TC71 | <0.0001 | <0.0001 | 0.6629    | 0.7571    |
|      | EW8  | <0.0001 | <0.0001 | 0.5429    | 0.6371    |
|      | A673 | <0.0001 | <0.0001 | 0.5338    | 0.5862    |
| ENT2 | TC32 | <0.0001 | <0.0001 | 0.47      | 0.57      |
|      | TC71 | <0.0001 | <0.0001 | 0.4733    | 0.5467    |
|      | EW8  | <0.0001 | <0.0001 | 0.4314    | 0.5466    |
|      | A673 | <0.0001 | <0.0001 | 0.499     | 0.541     |
| TK1  | TC32 | <0.0001 | <0.0001 | 0.3108    | 0.3492    |
|      | TC71 | <0.0001 | <0.0001 | 0.2986    | 0.3614    |
|      | EW8  | <0.0001 | <0.0001 | 0.3481    | 0.4319    |
|      | A673 | <0.0001 | <0.0001 | 0.309     | 0.351     |

**Supplementary Table 2:** Results table for confirmatory PCR on ENT1, ENT2, and TK1 in four cell-lines (Fig. 1c). FDR q: Benjamini-Hochberg false-discovery rate adjusted p-values. FCI: false coverage interval.

# Supplementary Table 3

A

| Cell | Treatment         | P       | FDR q   | FCI Lower | FCI Upper |
|------|-------------------|---------|---------|-----------|-----------|
| ENT1 | 50 nM Mithramycin | <0.0001 | <0.0001 | 0.3949    | 0.6292    |
|      | 50 nM EC8042      | <0.0001 | <0.0001 | 0.47      | 0.5476    |
|      | 15 nM EC8105      | <0.0001 | <0.0001 | 0.0801    | 0.11      |
|      | 24 uM 5-FU        | <0.0001 | <0.0001 | 2.1432    | 2.386     |
| ENT2 | 50 nM Mithramycin | <0.0001 | <0.0001 | 0.0873    | 0.3311    |
|      | 50 nM EC8042      | <0.0001 | <0.0001 | 0.2569    | 0.3221    |
|      | 15 nM EC8105      | <0.0001 | <0.0001 | 0.024     | 0.0345    |
|      | 24 uM 5-FU        | <0.0001 | <0.0001 | 1.3582    | 1.5416    |
| TK1  | 50 nM Mithramycin | <0.0001 | <0.0001 | 0.4401    | 0.6789    |
|      | 50 nM EC8042      | <0.0001 | <0.0001 | 0.646     | 0.7338    |
|      | 15 nM EC8105      | <0.0001 | <0.0001 | 0.4036    | 0.5408    |
|      | 24 uM 5-FU        | <0.0001 | <0.0001 | 1.7067    | 1.9526    |

B

| Cell  | Treatment   | Gene | P       | FDR q   | FCI Lower | FCI Upper |
|-------|-------------|------|---------|---------|-----------|-----------|
| MCF7  | Mithramycin | TK1  | 0.0372  | 0.0577  | 0.8450    | 0.9874    |
|       |             | ENT2 | 0.0385  | 0.0577  | 0.8062    | 0.9852    |
|       |             | ENT1 | 0.5341  | 0.5898  | 0.9135    | 1.1534    |
|       | 5 FU        | TK1  | <0.0001 | <0.0001 | 1.6289    | 1.7471    |
|       |             | ENT2 | 0.5898  | 0.5898  | 0.8940    | 1.0649    |
|       |             | ENT1 | 0.0003  | 0.0010  | 1.4130    | 1.7249    |
| A2058 | Mithramycin | TK1  | 0.8956  | 0.8956  | 0.8099    | 1.2164    |
|       |             | ENT2 | 0.0028  | 0.0113  | 1.3652    | 1.8328    |
|       |             | ENT1 | 0.0279  | 0.0418  | 1.0619    | 1.3426    |
|       | 5 FU        | TK1  | 0.0180  | 0.0361  | 1.1847    | 1.7749    |
|       |             | ENT2 | 0.5939  | 0.7127  | 0.6613    | 1.1958    |
|       |             | ENT1 | 0.0038  | 0.0113  | 1.4773    | 2.1597    |
| RD    | Mithramycin | TK1  | 0.6664  | 0.6881  | 0.8274    | 1.1172    |
|       |             | ENT2 | 0.6881  | 0.6881  | 0.8035    | 1.2814    |
|       |             | ENT1 | 0.6208  | 0.6881  | 0.7766    | 1.1428    |
|       | 5 FU        | TK1  | <0.0001 | 0.0005  | 1.8409    | 2.2739    |
|       |             | ENT2 | 0.4979  | 0.6881  | 0.8184    | 1.3411    |
|       |             | ENT1 | 0.0016  | 0.0047  | 1.3135    | 1.7052    |
| RH30  | Mithramycin | TK1  | 0.6879  | 0.6879  | 0.8544    | 1.0991    |
|       |             | ENT2 | 0.5188  | 0.6225  | 0.8683    | 1.2498    |
|       |             | ENT1 | 0.0986  | 0.1480  | 0.9812    | 1.3722    |
|       | 5 FU        | TK1  | 0.0038  | 0.0077  | 1.3742    | 1.9660    |
|       |             | ENT2 | 0.0022  | 0.0065  | 0.8938    | 0.9530    |
|       |             | ENT1 | 0.0001  | 0.0008  | 1.6301    | 1.9653    |

**Supplementary Table 3: (a)** Results table for the treatment of TC32 Ewing sarcoma cells with the mithramycin analogs EC-8042 and EC-8105 (Fig. 2b). **(b)** Results table testing the Expression of ENT1, ENT2, and TK1 in 4 control cell lines that do not express EWS-FLI1 (Fig. 2c). FDR q: Benjamini-Hochberg false-discovery rate adjusted p-values. FCI: false coverage interval.

## Supplementary Table 4

A

| Comparison    | Estimated Difference | P        | 95% FCI Lower | 95% FCI Upper |
|---------------|----------------------|----------|---------------|---------------|
| siEWS - siNeg | 0.7775               | < 0.0001 | 0.6929        | 0.8621        |
| MMA - siNeg   | 0.8475               | < 0.0001 | 0.7629        | 0.9321        |
| 8105 - siNeg  | 0.7960               | < 0.0001 | 0.7114        | 0.8806        |
| 8042 - siNeg  | 0.8431               | < 0.0001 | 0.7584        | 0.9277        |
| 5FU - siNeg   | -1.1000              | < 0.0001 | -1.1846       | -1.0154       |

B

| Comparison    | Estimated Difference | P      | 95% FCI Lower | 95% FCI Upper |
|---------------|----------------------|--------|---------------|---------------|
| siEWS - siNeg | 0.0175               | 0.7909 | -0.1100       | 0.1450        |
| MMA - siNeg   | 0.1225               | 0.1897 | -0.0050       | 0.2500        |
| 8105 - siNeg  | -0.02                | 0.7909 | -0.1475       | 0.1075        |
| 8042 - siNeg  | 0.075                | 0.4398 | -0.0525       | 0.2025        |
| 5FU - siNeg   | 0.57                 | 0.0000 | 0.4425        | 0.6975        |

**Supplementary Table 4:** (a) Results table for changes in  $^{18}\text{F}$ -FLT PET in TC32 Ewing Sarcoma cells treated with Mithramycin and its analogs EC-8042 and EC-8105 (b) Results table for changes in  $^{18}\text{F}$ -FDG PET in TC32 Ewing Sarcoma cells treated with Mithramycin and its analogs EC-8042 and EC-8105. (Fig. 3a). FDR  $q$ : Benjamini-Hochberg false-discovery rate adjusted  $p$ -values. FCI: false coverage interval.

# Supplementary Figure 1

## Mithramycin

T = 0 h

T = 24 h

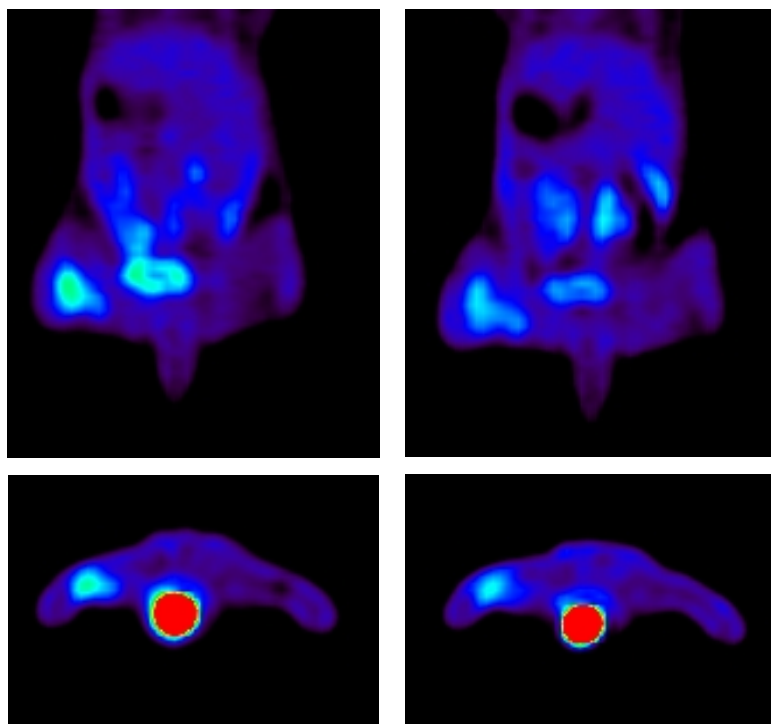

**Supplementary Figure 1: Treatment of mice bearing a Ewing sarcoma xenograft with mithramycin.** Mithramycin (1 mg/kg) suppressed  $^{18}\text{F}$ -FLT activity at 24 h. Bladder cross section (lower panel) confirms similar amounts of tracer administered.

## Supplementary Figure 2

### EC-8105

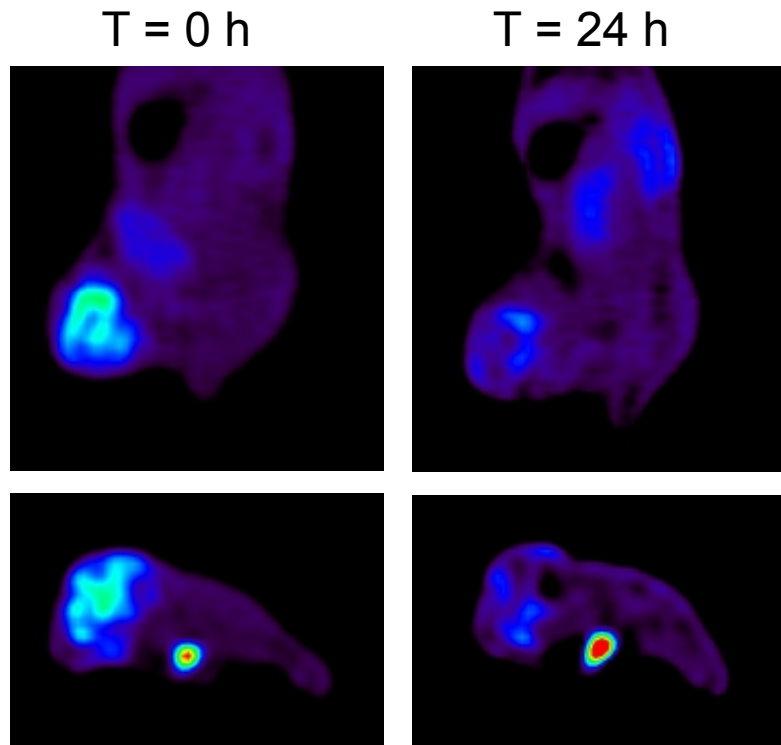

**Supplementary Figure 2: Treatment of mice bearing a Ewing sarcoma xenograft with EC-8105.** EC-8105 (1.5 mg/kg) suppressed  $^{18}\text{F}$ -FLT activity at 24 h. Bladder cross section (lower panel) confirms similar amounts of tracer administered.

# Supplementary Figure 3

5-FU

T = 0 h

T = 6 h

T = 24 h

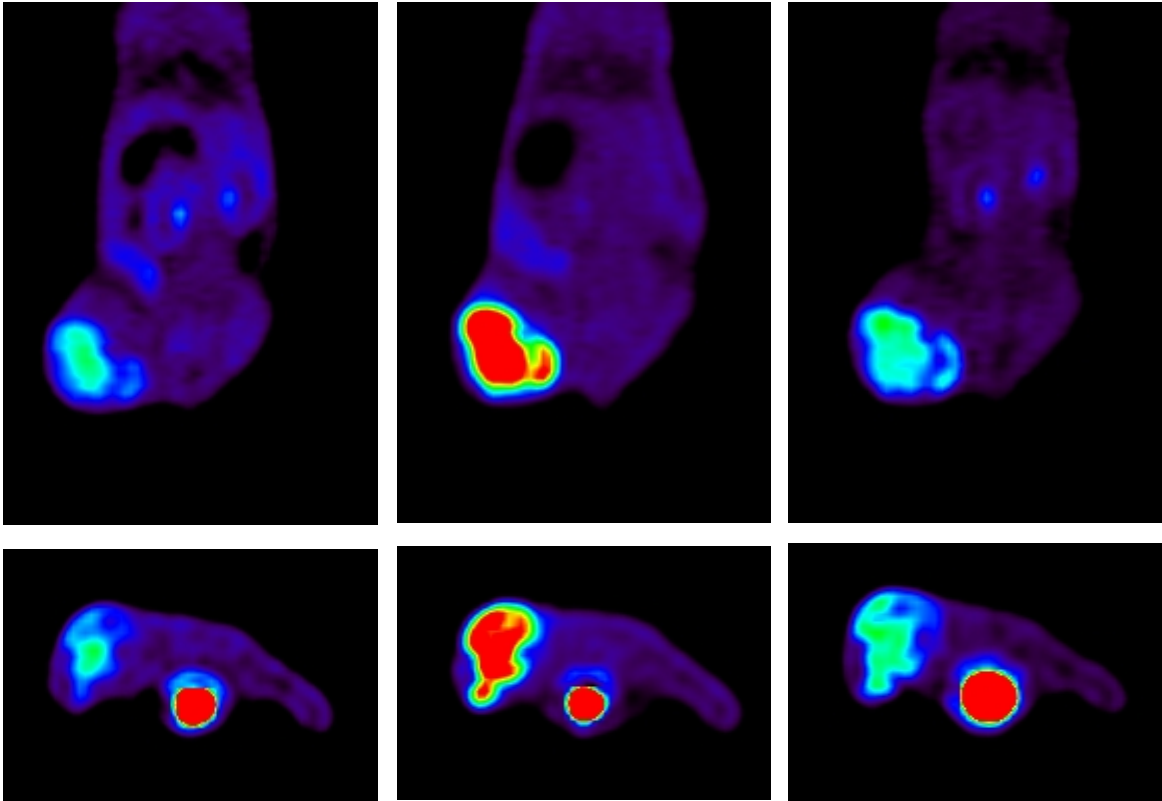

**Supplementary Figure 3: Treatment of mice bearing a Ewing sarcoma xenograft with 5-FU.** 5-FU (50 mg/kg) induced  $^{18}\text{F}$ -FLT activity at 6 h. Bladder cross section (lower panel) confirms similar amounts of tracer administered.



## Supplementary Figure 4

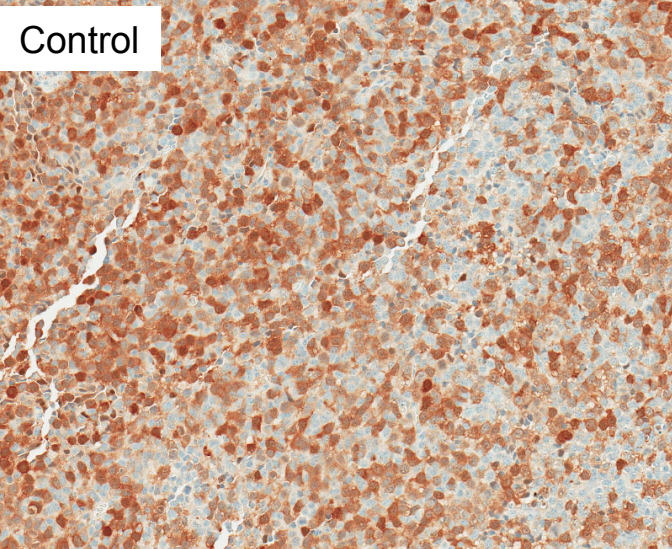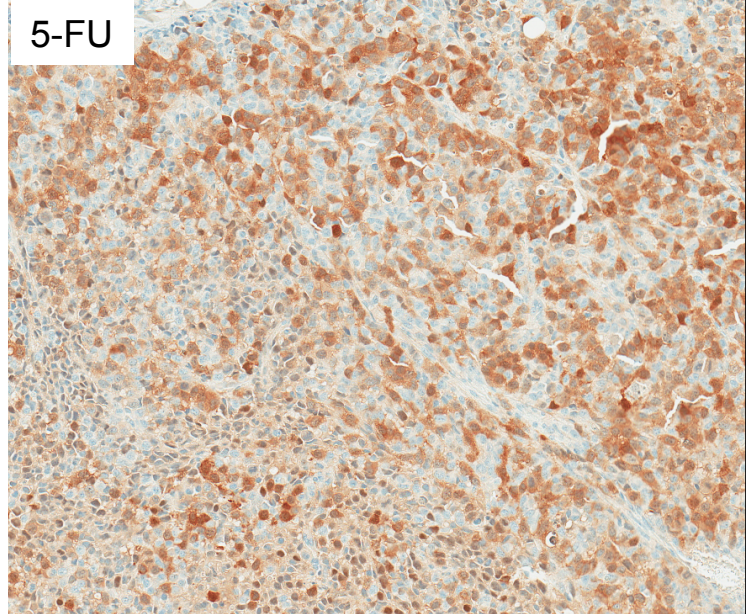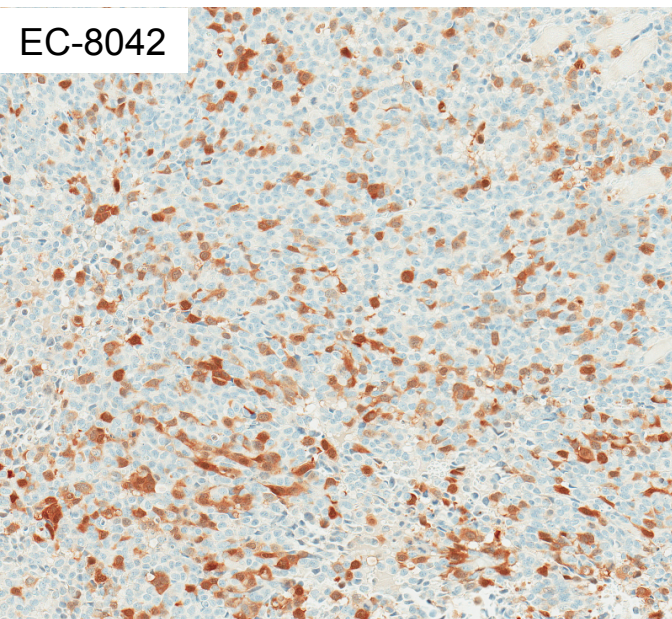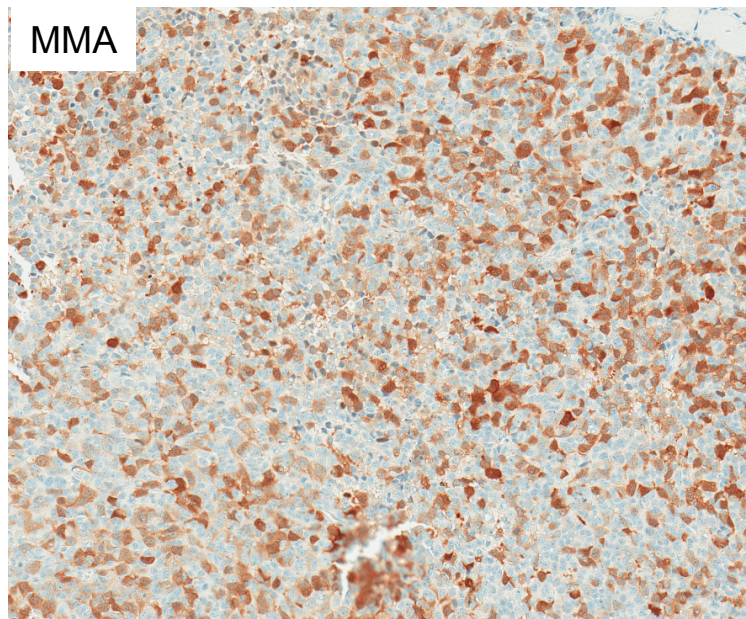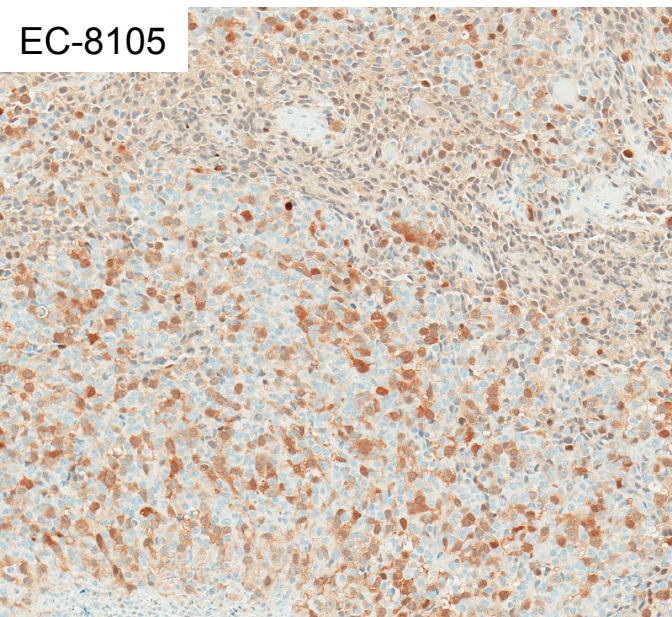

**Supplementary Figure 4:** Expanded 10X view of tissue collected at 24 hours stained for TK1 following treatment with Vehicle (control), 5-FU, EC-8042, Mithramycin (MMA), or EC-8105
